# Supplementary material for: High efficiency screening of nine lipid-lowering adulterants in herbal dietary supplements using thin layer chromatography coupled with surface enhanced Raman spectroscopy
Source: Royal Society of Chemistry journal article supplement (doi:10.1039/c6ay03441a), 2017-01-01
Supplement: c6ay03441a1.pdf [file c6ay03441a1.pdf]

## Electronic Supplementary Information

### High efficiency screening of nine lipid-lowering adulterants in herbal dietary supplements by using thin layer chromatography coupled with surface enhanced Raman spectroscopy

Qingxia Zhu <sup>1</sup> · Mengyun Chen <sup>2</sup> · Lu Han <sup>1</sup> · Yongfang Yuan <sup>1,\*</sup> · Feng Lu <sup>2,\*\*</sup>

<sup>1</sup> Department of Pharmacy, Shanghai Ninth People's Hospital, Shanghai JiaoTong University School of Medicine, Shanghai, 201999, China.

<sup>2</sup> Department of Pharmaceutical Analysis, School of Pharmacy, Second Military Medical University, Shanghai, 200433, China.

---

\* Corresponding author. E-mail addresses: nmxyyf@126.com (Y. Yuan)

\*\* Corresponding author. E-mail addresses: fenglufeng@hotmail.com (F. Lu).

Qingxia Zhu and Mengyun Chen contributed equally to this work.

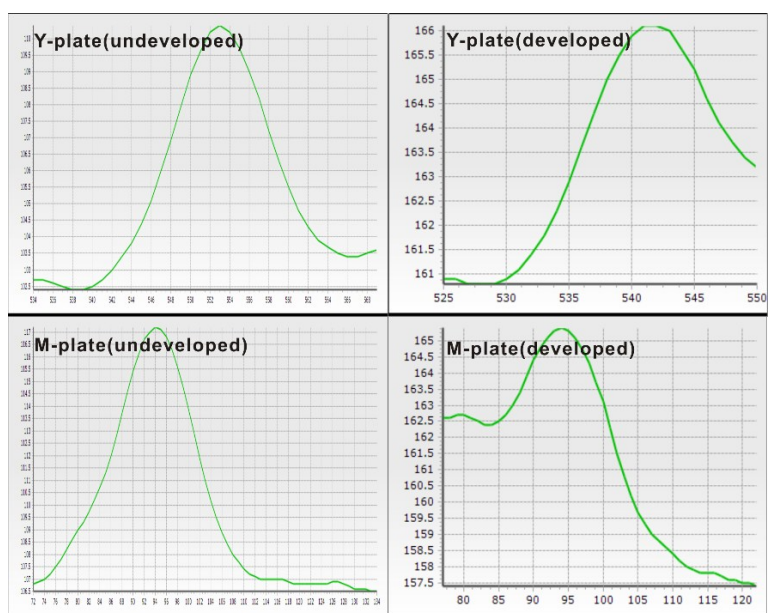

**Fig. S1.** The chromatographic peaks of undeveloped and developed spots on different TLC plates.

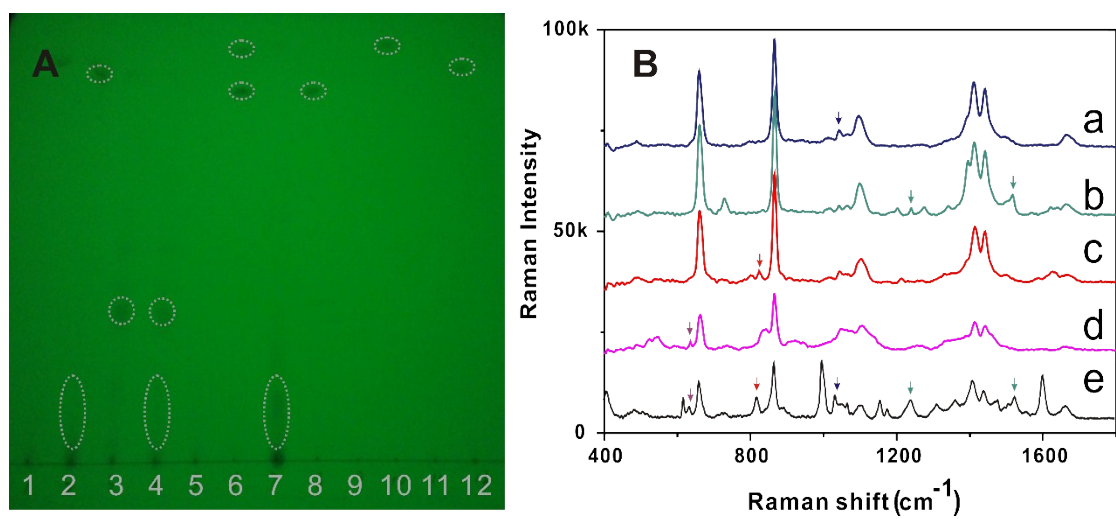

**Fig. S2.** (A) The TLC image of HDS matrix developed by dichloromethane-methanol-water 8:2:0.2 (v/v) and (B) the SERS spectra of matrix (a-d) and ATO (e).

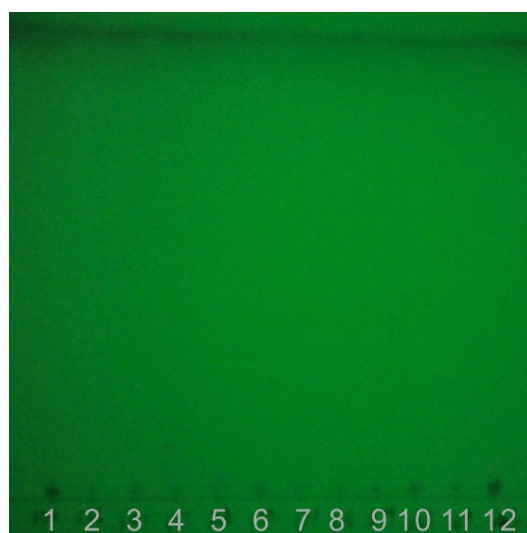

**Fig. S3.** The TLC image of HDS matrix developed by petroleum ether-acetic ether - acetic acid 5.5:2.8:1(v/v).

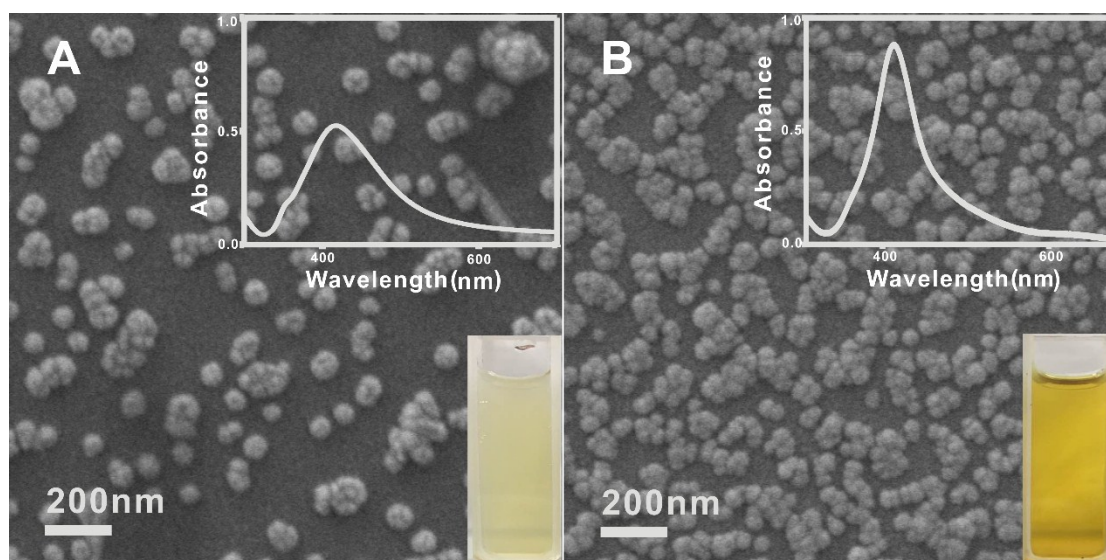

**Fig. S4.** UV-vis spectra and SEM image of the prepared silver colloids: (A) L-colloids and (B) D-colloids. The inset shows the accompanying color of the prepared silver colloids.

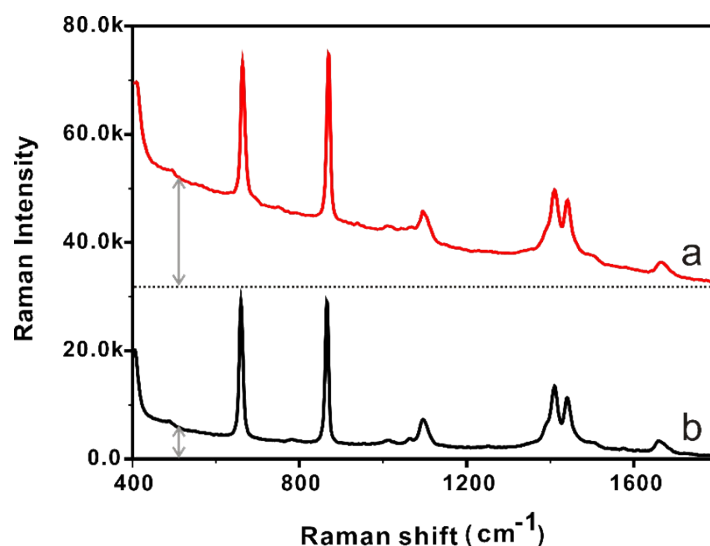

**Fig. S5.** The fluorescence interference from different HPTLC plates: (a) Y-plate and (b) M-plate.

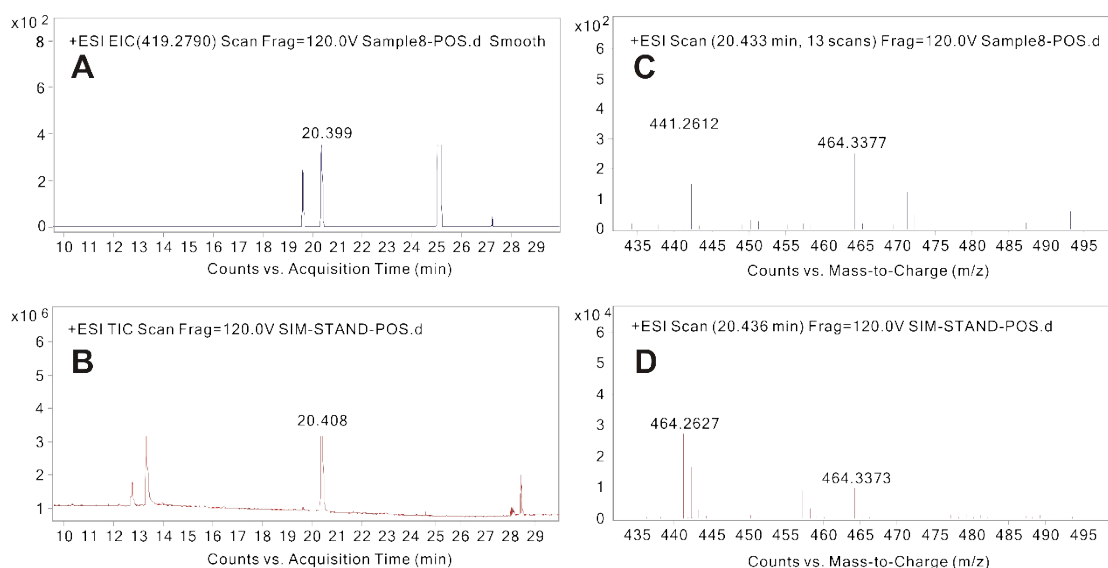

**Fig. S6.** HPLC spectra of (A) sample 8 and (B) standards of SIM; MS spectra of (C) sample 8 and standard of (D) SIM.

**LC-MS verification conditions:** ACQUITY UPLCTM BEH C18 column (2.1 mm×100 mm, 1.7μm, Waters, Milford, MA) was used with a mobile-phase gradient prepared from formic acid (component A) and 0.1% formic acid in acetonitrile (component B). The gradient was: held at 5% B for 2 min, linear increase from 5-25% B in 7 min, linear increase from 25-55% B in 11 min, linear increase from 60-95% B in 3 min, and held at 95 % B for 2 min. The flow rate was 0.35 mL/min, the injection volume was 4 μL, and the column temperature was 40°C. The following MS conditions were applied: ion source was the ESI source, using the positive ion mode (detection of PRO with negative ion mode). MS scanning range was from 100 to 1100 m/z.

**Table S1** LOD comparison of six analytes by LC-MS/MS method and TLC-SERS method (unit:  $\mu\text{g}$ ).

|                 | <b>NIC</b> | <b>PRA</b> | <b>ATO</b> | <b>FLU</b> | <b>BEZ</b> | <b>SIM</b> | <b>FEN</b> |
|-----------------|------------|------------|------------|------------|------------|------------|------------|
| <b>LC-MS/MS</b> | 0.02       | 0.012      | 0.004      | 0.004      | 0.02       | 0.002      | 0.002      |
| <b>TLC-SERS</b> | 0.0025     | 0.01       | 0.0025     | 0.01       | 0.001      | 0.05       | 0.005      |

**Table S2** Validation of SIM in sample 8 by UPLC-QTOF/MS.

| <b>Name</b>  | <b>Identification formula</b><br><b>[M+H]<sup>+</sup></b> | <b>Mass</b> | <b>Error (ppm)</b> |
|--------------|-----------------------------------------------------------|-------------|--------------------|
| SIM standard | $\text{C}_{25}\text{H}_{38}\text{O}_5$                    | 418.5719    | -0.38              |
| Sample 8     | $\text{C}_{25}\text{H}_{38}\text{O}_5$                    | 418.5714    | -0.12              |
